# Supplementary material
Source: ML conference proceedings conference paper supplement (https://openreview.net/forum?id=y7ahj9RoXQ)

**Crease pattern**

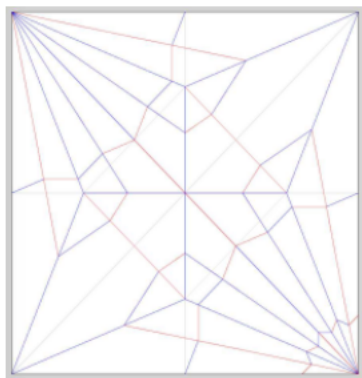

**Compiled principal view**

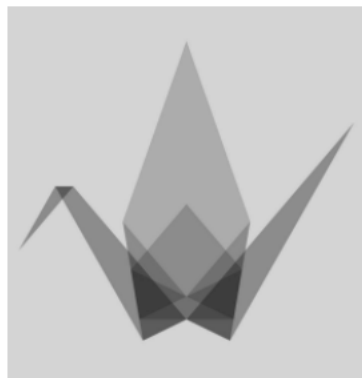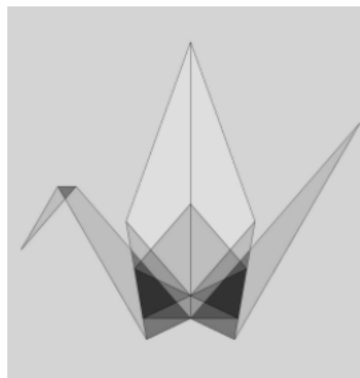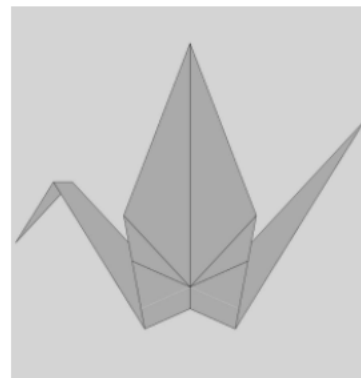

**Three-dimensional view**

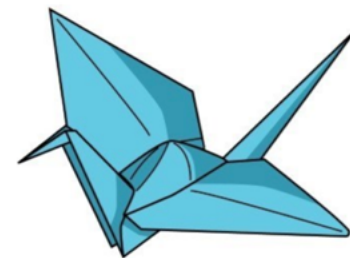

**Intermediate steps of origami**

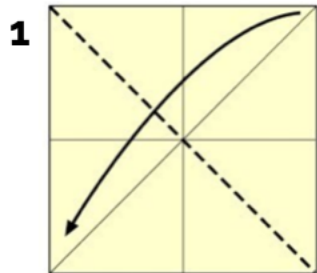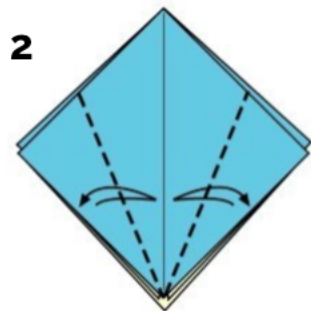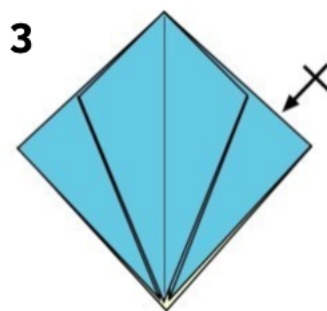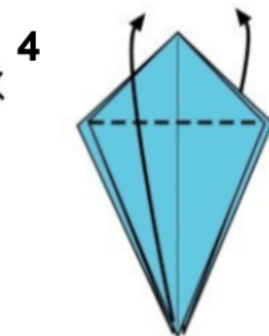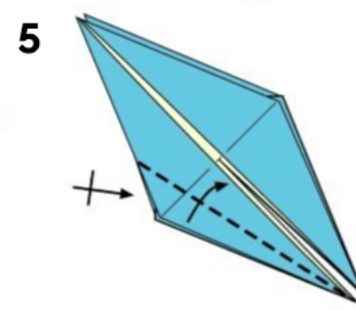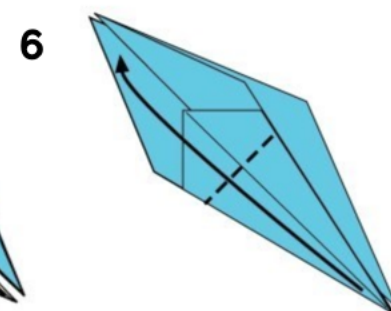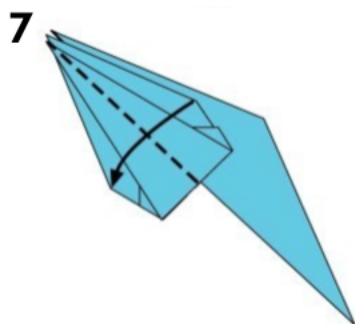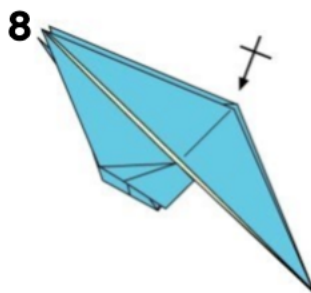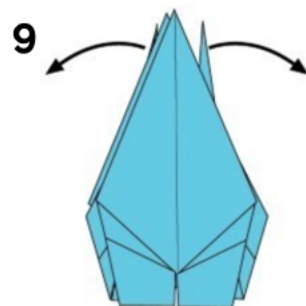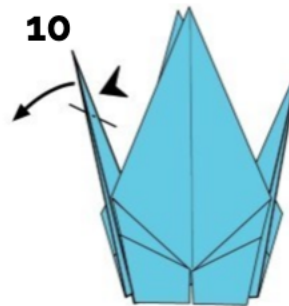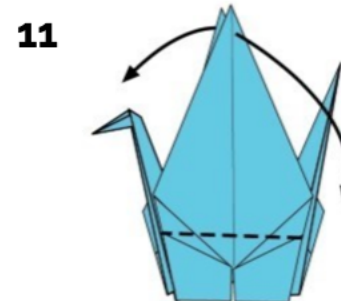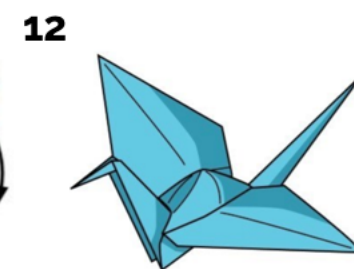

Supplement: supplementary_material [file case.pdf › figs/case.pdf]
