# Supplementary material
Source: ML conference proceedings conference paper supplement (https://openreview.net/forum?id=y7ahj9RoXQ)

Crease pattern

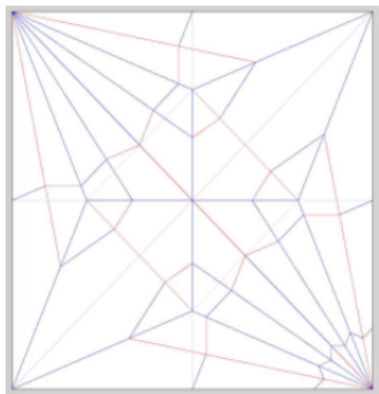

Compiled principal view

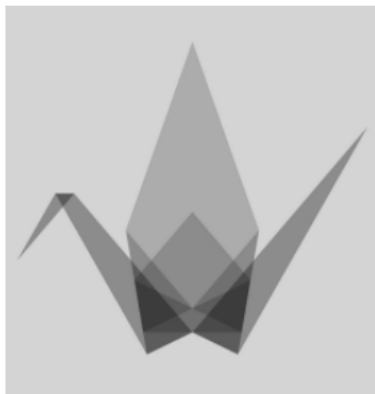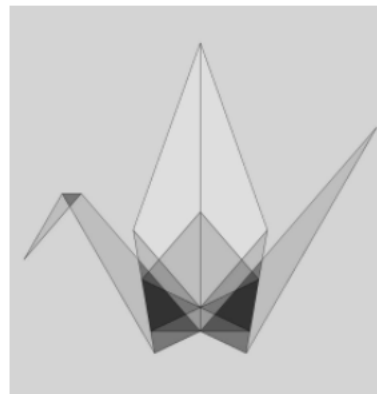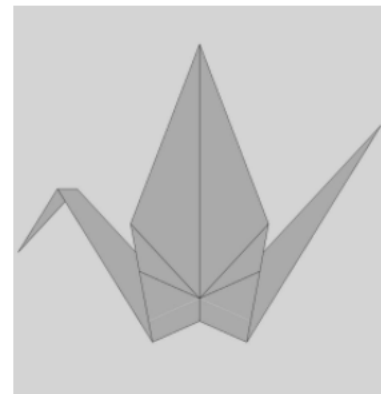

Three-dimensional view

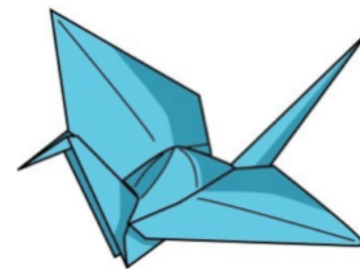

Crease pattern code

```
{
  "vertices_coords": [
    [0, 0],
    [0, 1],
    [1, 0],
    [1, 1],
    [0.5, 0.5]
  ],
  "edges_vertices": [
    [0, 1],
    [1, 3],
    [3, 2],
    [2, 0],
    [0, 4],
    [1, 4],
    [2, 4],
    [3, 4]
  ],
  "edges_assignment": [
    "M",
    "M",
    "M",
    "M",
    "V",
    "V",
    "V",
    "V"
  ],
  "faces_vertices": [
    [0, 1, 3, 2]
  ]
}
```

Intermediate steps of origami

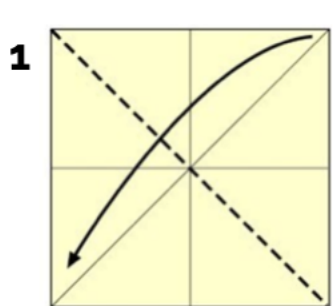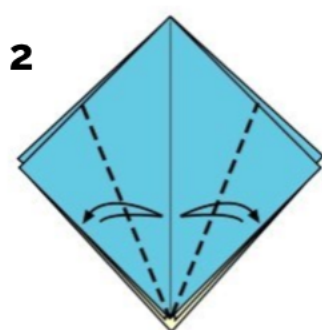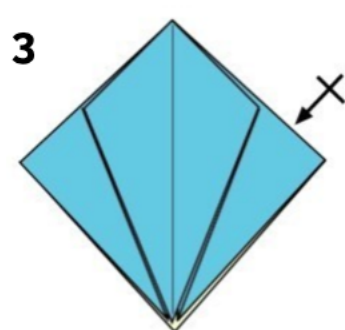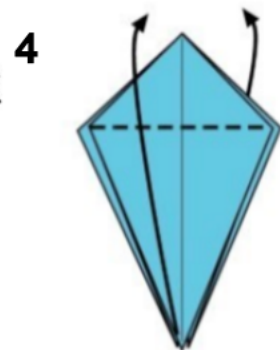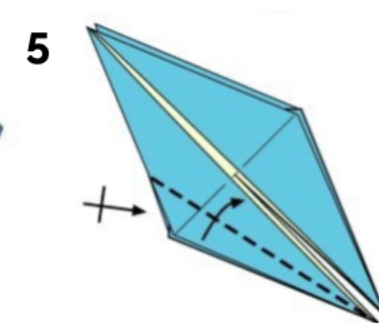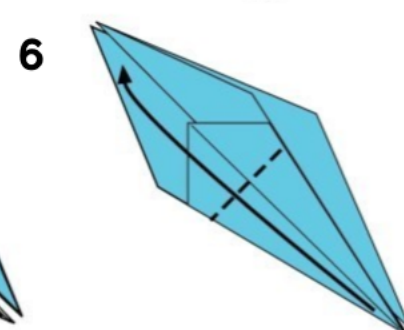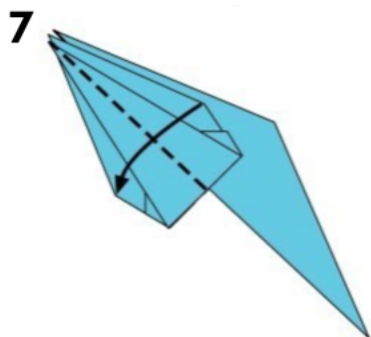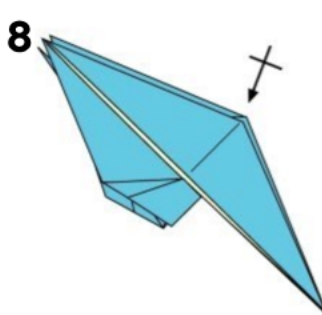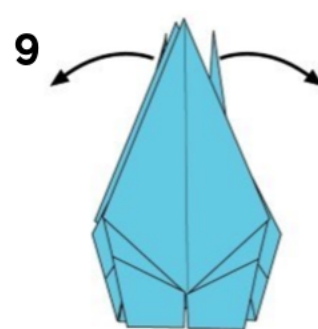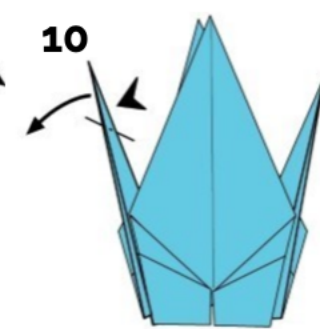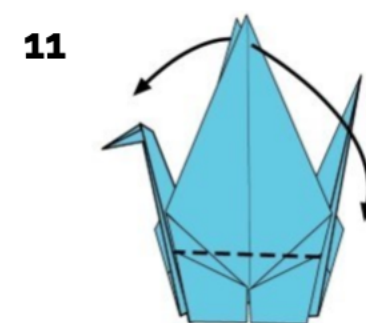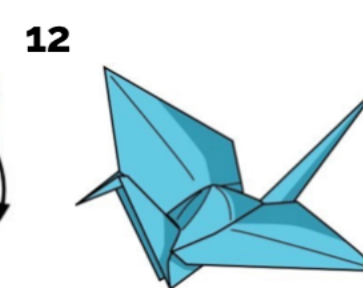

Supplement: supplementary_material [file case_2.pdf › figs/case_2.pdf]
