# Supplementary material
Source: ML conference proceedings conference paper supplement (https://openreview.net/forum?id=y7ahj9RoXQ)
Supplement: supplementary_material [file data_1.pdf › figs/data_1.pdf]

## Task1: Pattern Prediction

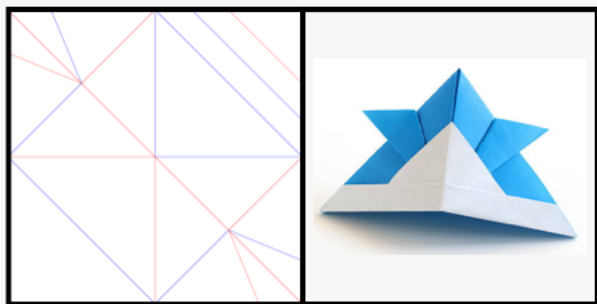

Q: What pattern will this crease diagram form after being folded?

- A: snail                      C: teacup  
B: samurai hat    D: pencil

## Task2: Spatial Relationship Prediction

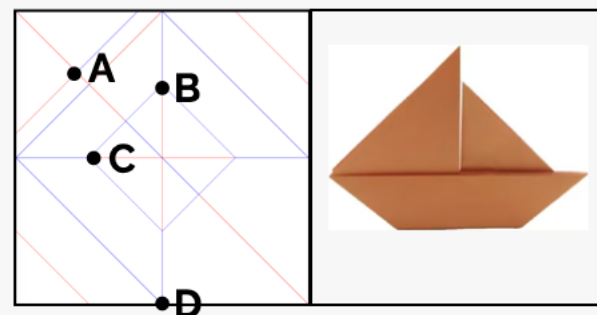

Q: After folding, in the sailboat model, which two original points have the largest distance change?

- A: A pt and B pt      B: B pt and D pt  
C: A pt and C pt      D: A pt and D pt

## Task3: Multi-step Spatial Reasoning

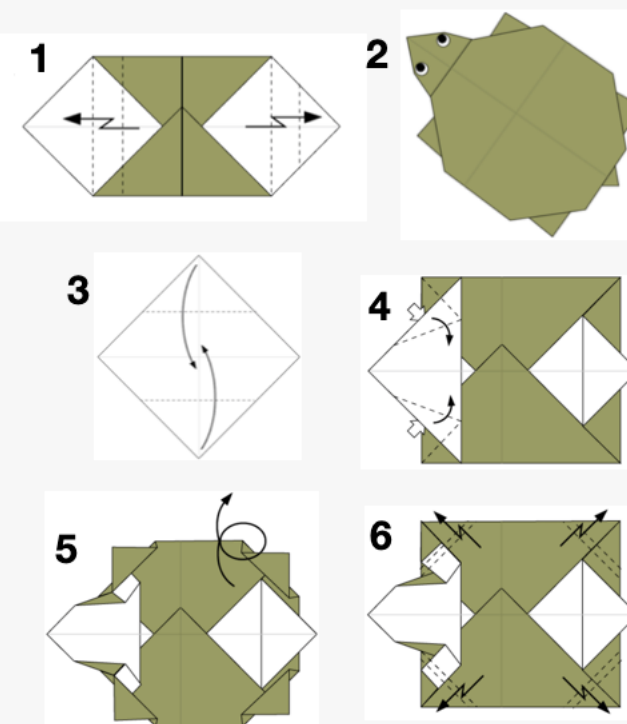

Q: Which of the following origami sequences is correct?

- A: 3-4-1-6-5-2  
B: 3-1-6-4-5-2  
C: 3-1-4-6-5-2  
D: 3-1-4-5-6-2

## Task4: End-to-End CP Code Generation

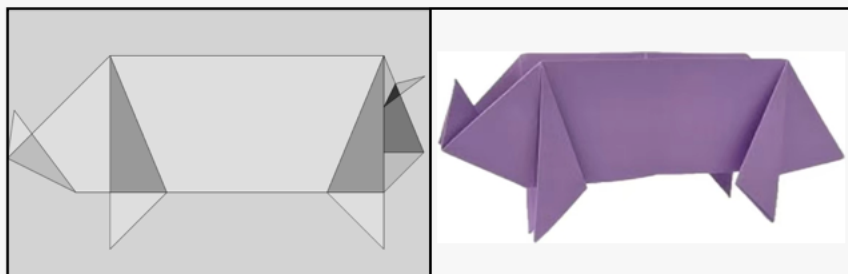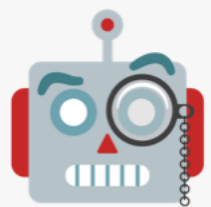

In-context Learning

Environment Learning

Reinforce Learning

```
{vertices_coords: [0, 0], [1, 0], [1, 1], [0, 1]
edges_vertices: [0, 1], [1, 2], [2, 3], [3, 0], [0, 2]
edges_assignment: [B, B, B, B, M]
faces_vertices: [0, 1, 2], [0, 2, 3]}
```
