# Supplementary material
Source: ML conference proceedings conference paper supplement (https://openreview.net/forum?id=y7ahj9RoXQ)

Task1: Pattern Prediction

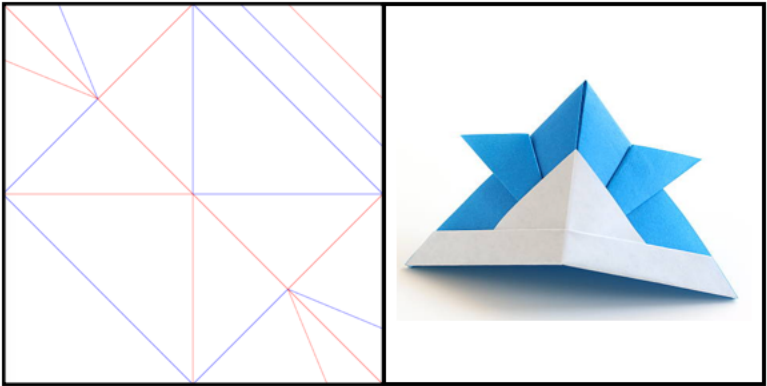

Q: What pattern will this crease diagram form after being folded?

- A: snail
- B: samurai hat
- C: teacup
- D: pencil

Task2: Spatial Relationship Prediction

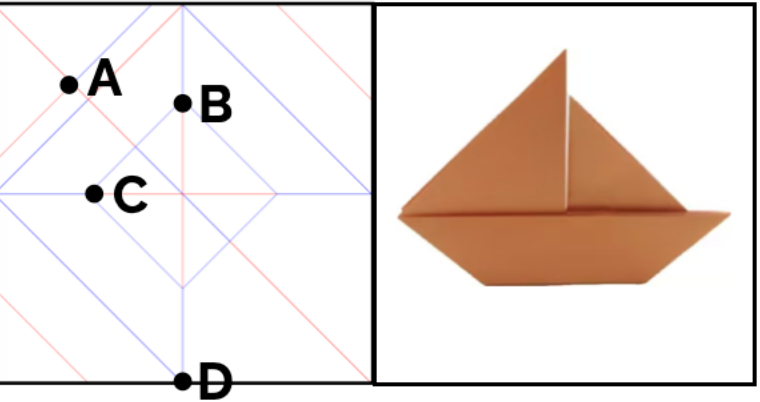

Q1: After folding the sailboat, place the model on a table with the sail facing upwards. The final position of point A is:

- A: Located at the bottom of the sailboat and in contact with the table
- B: Located above the sail of the sailboat
- C: Hidden in the sailboat's interior
- D: Coincides with point C and is located at the stern of the sailboat

Q2: After completing the origami fold, how many layers of paper are stacked in the thickest folded part of the sailboat?

- A: 1 layer
- B: 2 layers
- C: 3 layers
- D: 4 layers

Q3: After folding, in the sailboat model, which two original points have the largest distance change?

- A: A pt and B pt
- B: B pt and D pt
- C: A pt and C pt
- D: A pt and D pt

Task3: Spatial Relationship Prediction

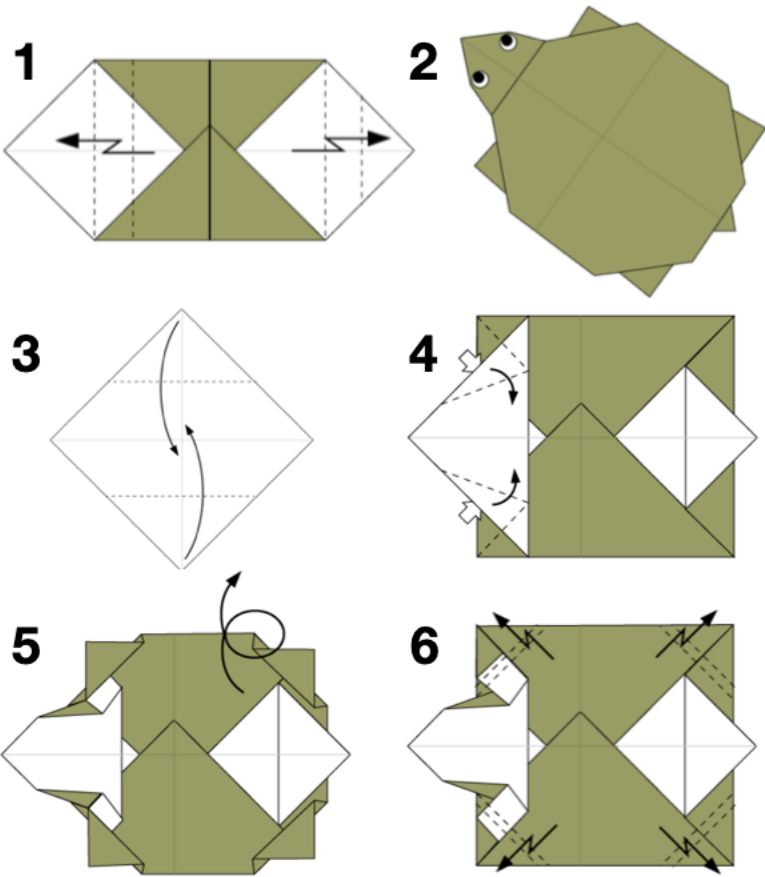

Q: Which of the following origami sequences is correct?

- A: 3-4-1-6-5-2
- B: 3-1-6-4-5-2
- C: 3-1-4-6-5-2
- D: 3-1-4-5-6-2

Task4: End-to-End CP Code Generation

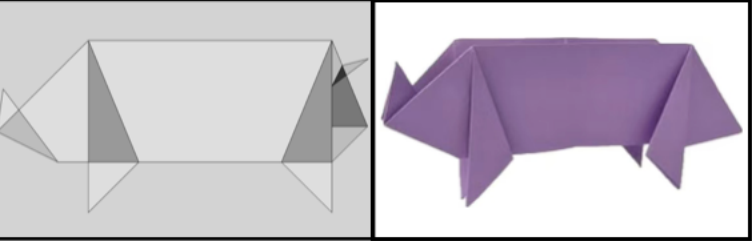

Q: Write the CP code.

Zero/Few-shot learning

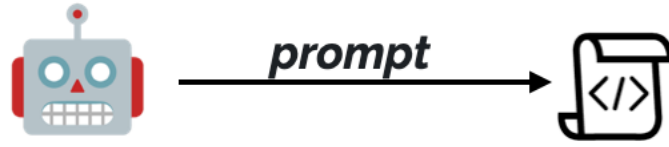

Enviroment learning

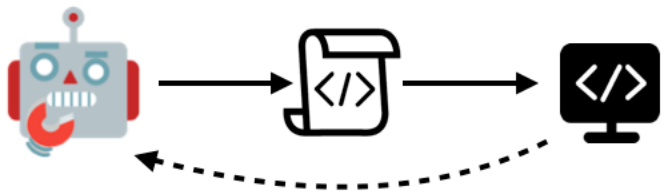

Reinforce learning

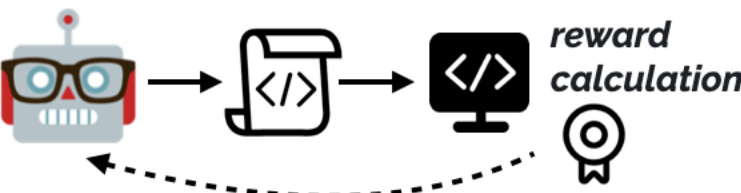

Supplement: supplementary_material [file data_2.pdf › figs/data_2.pdf]
