# Supplementary material
Source: ML conference proceedings conference paper supplement (https://openreview.net/forum?id=y7ahj9RoXQ)

## Task1: Pattern Prediction

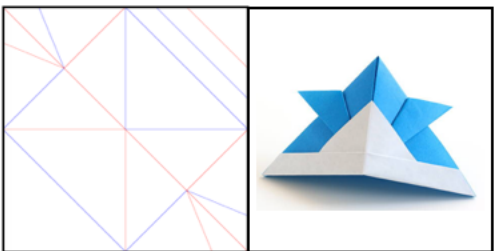

*Q: What pattern will this crease diagram form after being folded?*

- A: snail      B: samurai hat  
C: teacup      D: pencil

## Task2: Spatial Relationship Prediction

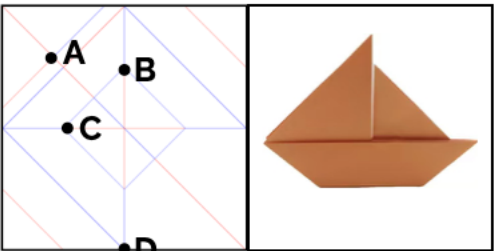

*Q1: After folding the sailboat, place the model on a table with the sail facing upwards. The final position of point A is:*

- A: Located at the bottom of the sailboat and in contact with the table  
B: Located above the sail of the sailboat  
C: Hidden in the sailboat's interior  
D: Coincides with point C and is located at the stern of the sailboat

*Q2: After completing the origami fold, how many layers of paper are stacked in the thickest folded part of the sailboat?*

- A: 1 layer      B: 2 layers  
C: 3 layers      D: 4 layers

*Q3: After folding, in the sailboat model, which two original points have the largest distance change?*

- A: A pt and B pt      B: B pt and D pt  
C: A pt and C pt      D: A pt and D pt

## Task3: Multi-step Spatial Reasoning

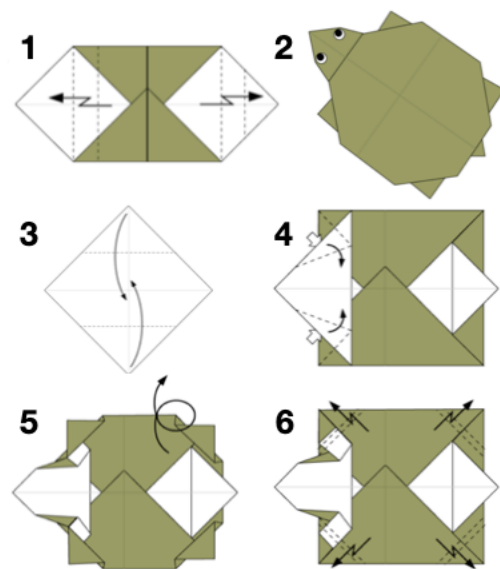

*Q: Which of the following origami sequences is correct?*

- A: 3-4-1-6-5-2      B: 3-1-6-4-5-2  
C: 3-1-4-6-5-2      D: 3-1-4-5-6-2

## Task4: End-to-End CP Code Generation

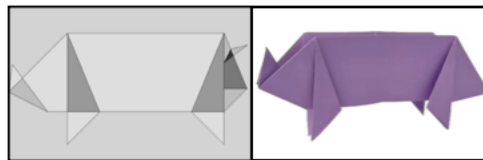

*Q: Write the CP code.*

Zero/Few-shot learning

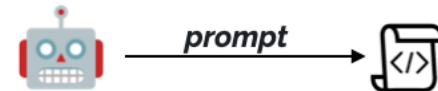

Environment learning

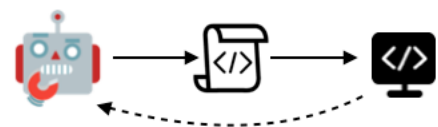

Reinforce learning

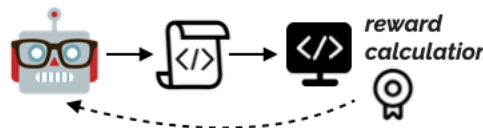

Supplement: supplementary_material [file data_5.pdf › figs/data_5.pdf]
