# Supplementary material
Source: ML conference proceedings conference paper supplement (https://openreview.net/forum?id=y7ahj9RoXQ)

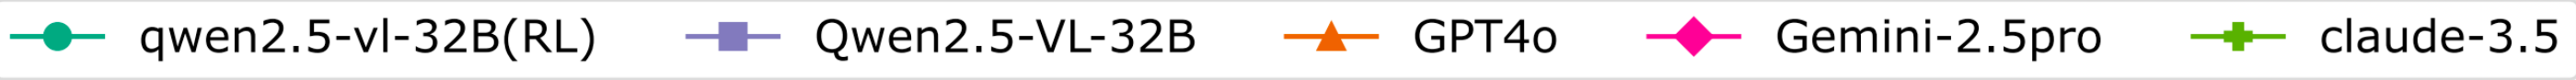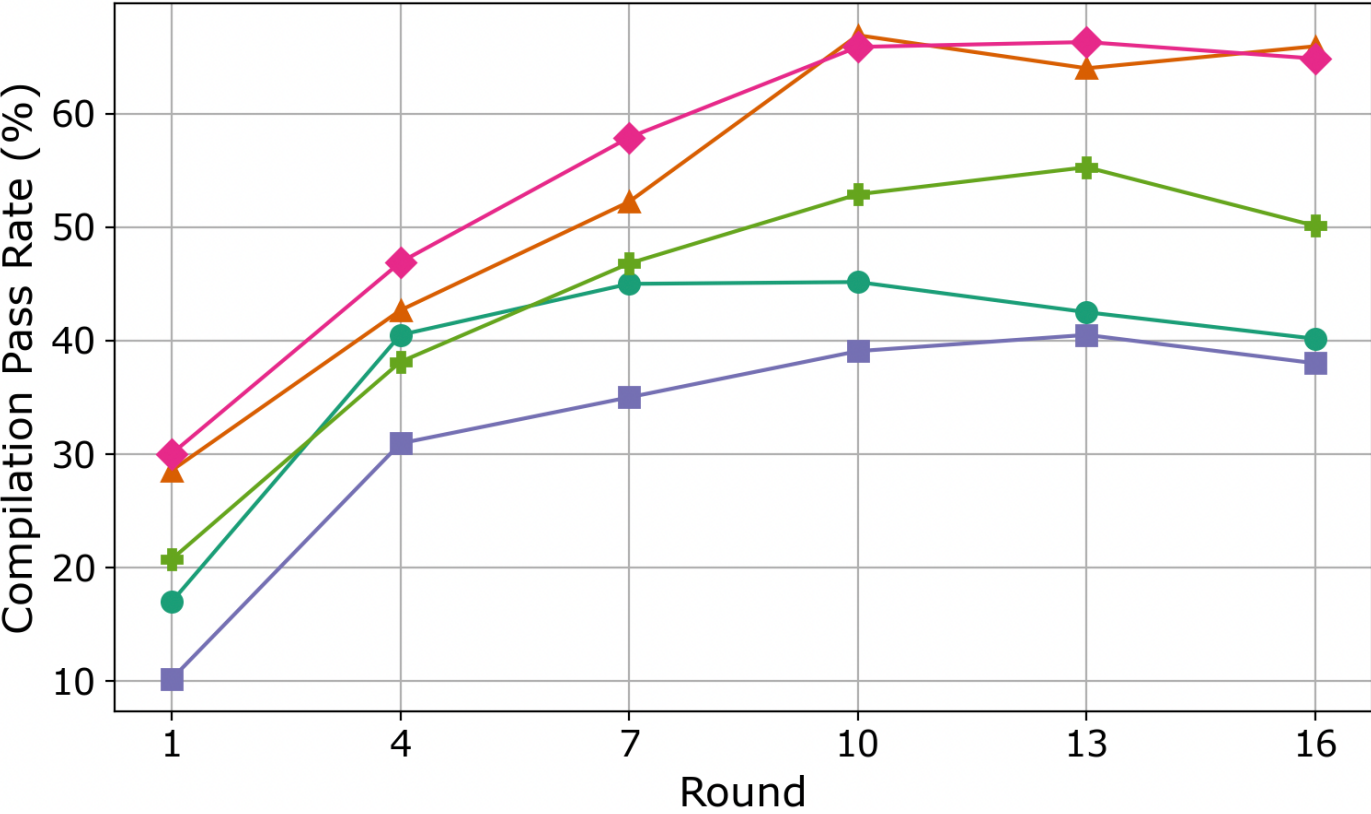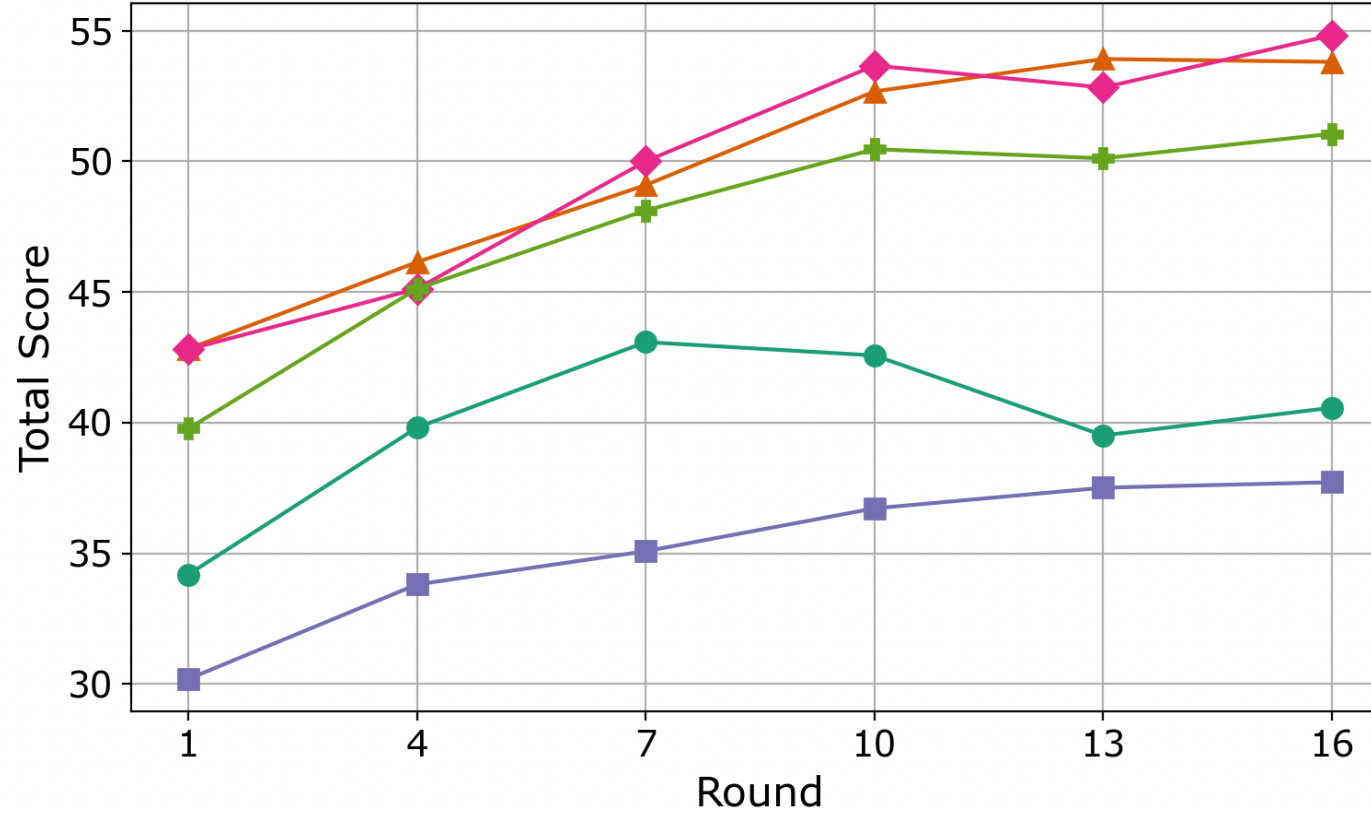

Supplement: supplementary_material [file a.pdf › figs/a.pdf]
